# Supplementary material
Source: PubMed Central journal article supplement (PMC6176807)

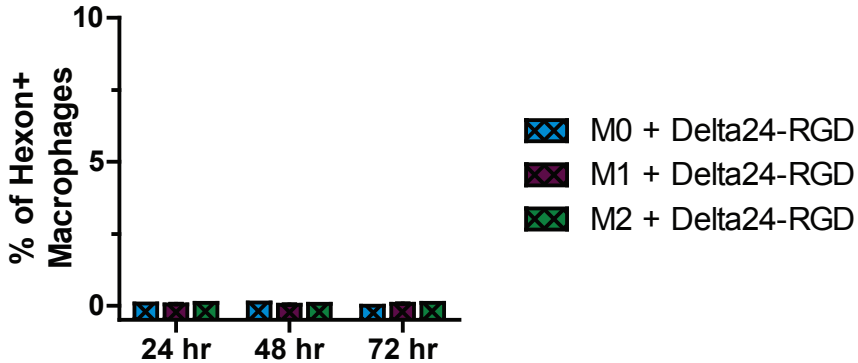

Supplement: noy082_suppl_fig_s1.pdf [file noy082_suppl_fig_s1.pdf]

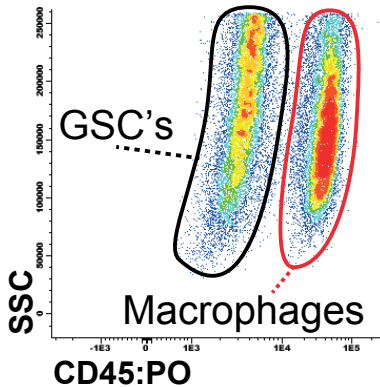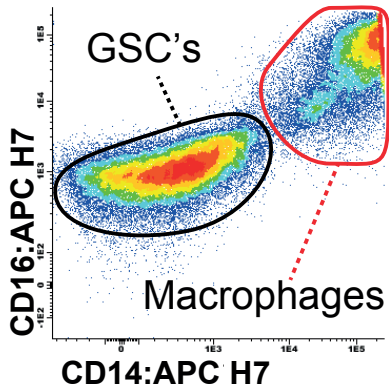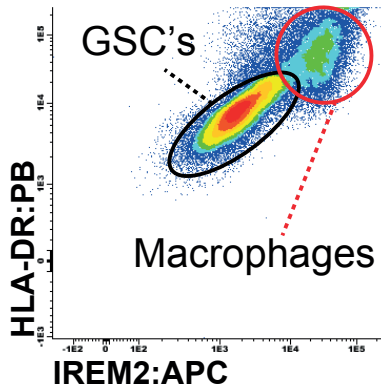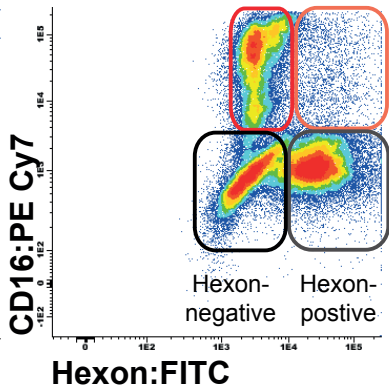

Supplement: noy082_suppl_fig_s2.pdf [file noy082_suppl_fig_s2.pdf]
